# Supplementary material
Source: publisher figshare collection journal article supplement (https://acs.figshare.com/ndownloader/files/22438343)
Supplement: Supplementary file 1 [file 22438343]

Supporting Information for

# Noncontact Tunneling in Methylammonium Lead Iodide ( $\text{CH}_3\text{NH}_3\text{PbI}_3$ ): Evidence of Bipolar Resistive Switching through Defect Migration

*Subham Paramanik, Soumyo Chatterjee, and Amlan J. Pal\**

School of Physical Sciences, Indian Association for the Cultivation of Science, Jadavpur,  
Kolkata 700032, India

AUTHOR EMAIL ADDRESS: [sspajp@iacs.res.in](mailto:sspajp@iacs.res.in)

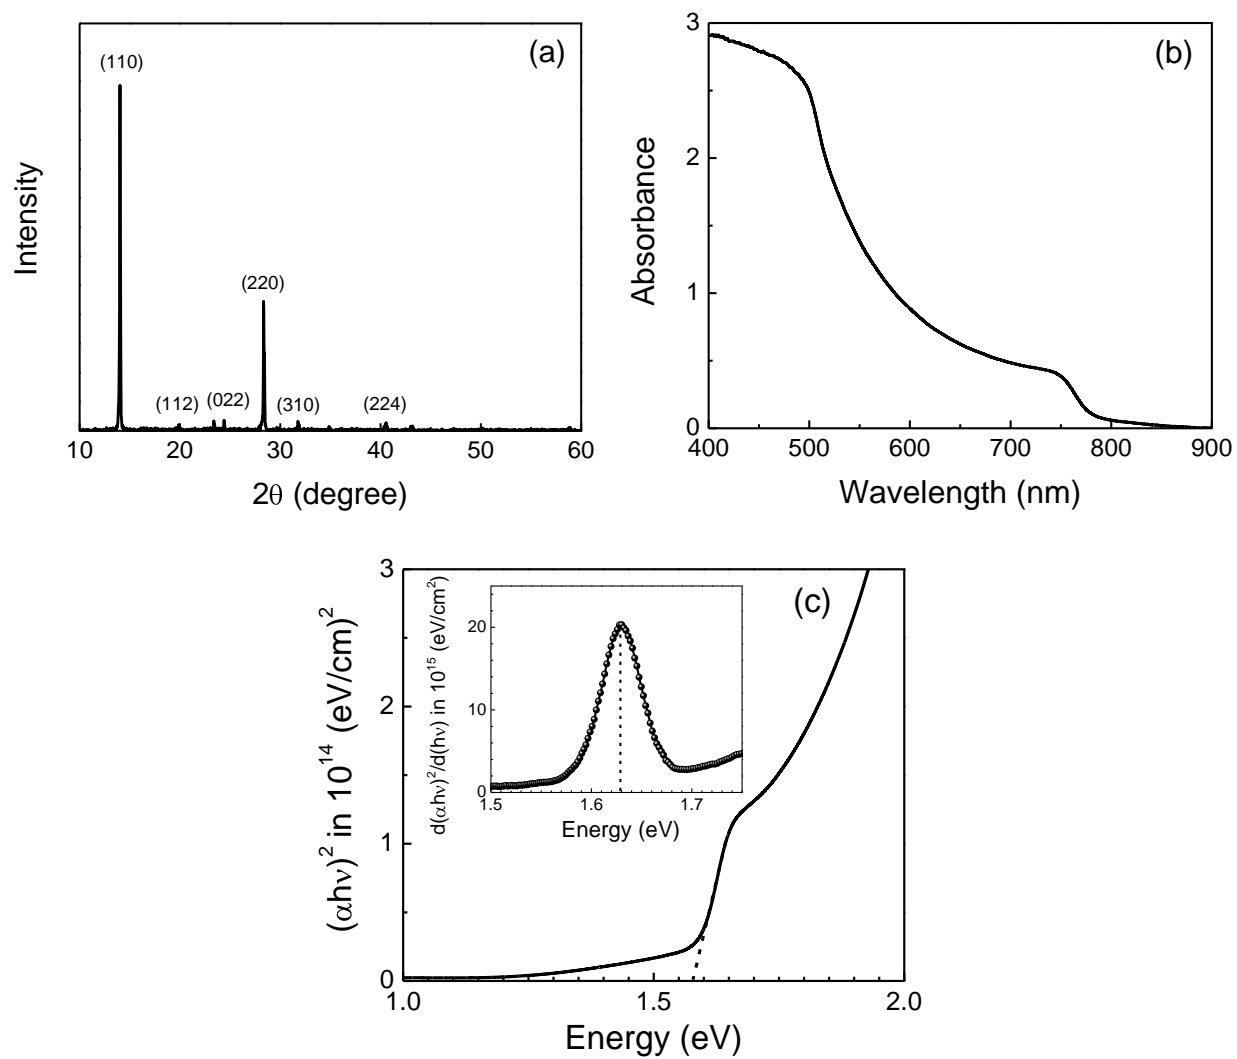

**Figure S1.** (a) XRD pattern, (b) optical absorption spectrum, and (c) associated Tauc plot along with a plot of  $d(\alpha h\nu)^2/d(h\nu)$  versus energy to estimate the optical bandgap of MAPbI<sub>3</sub> perovskite thin-films.

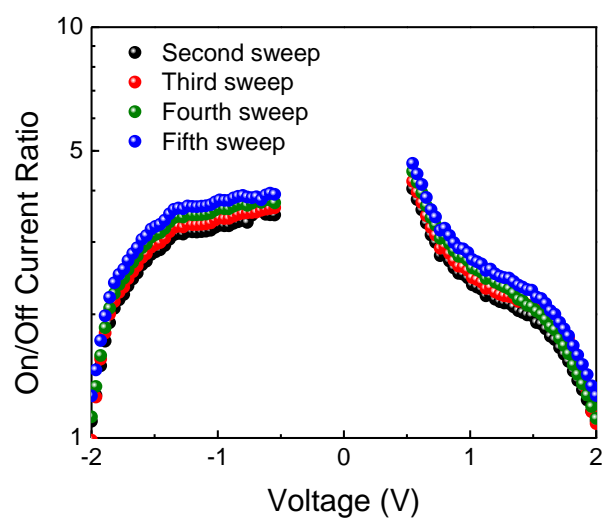

**Figure S2.** On/Off ratio during subsequent current-voltage scans as mentioned in the legends.

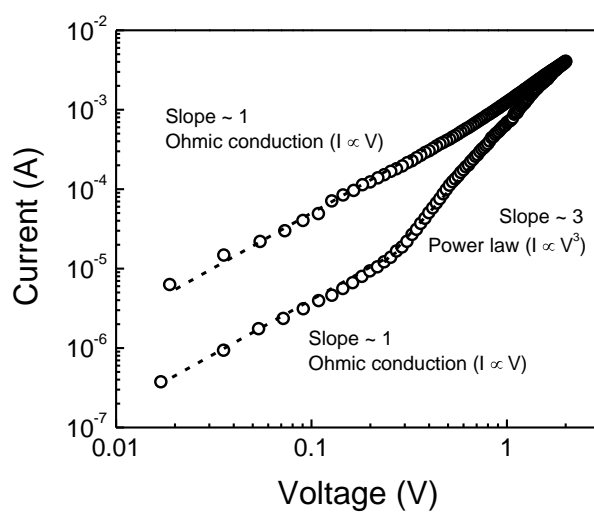

**Figure S3.** Current-voltage characteristics of a MAPI device in a double-logarithmic scale for the negative voltage region.

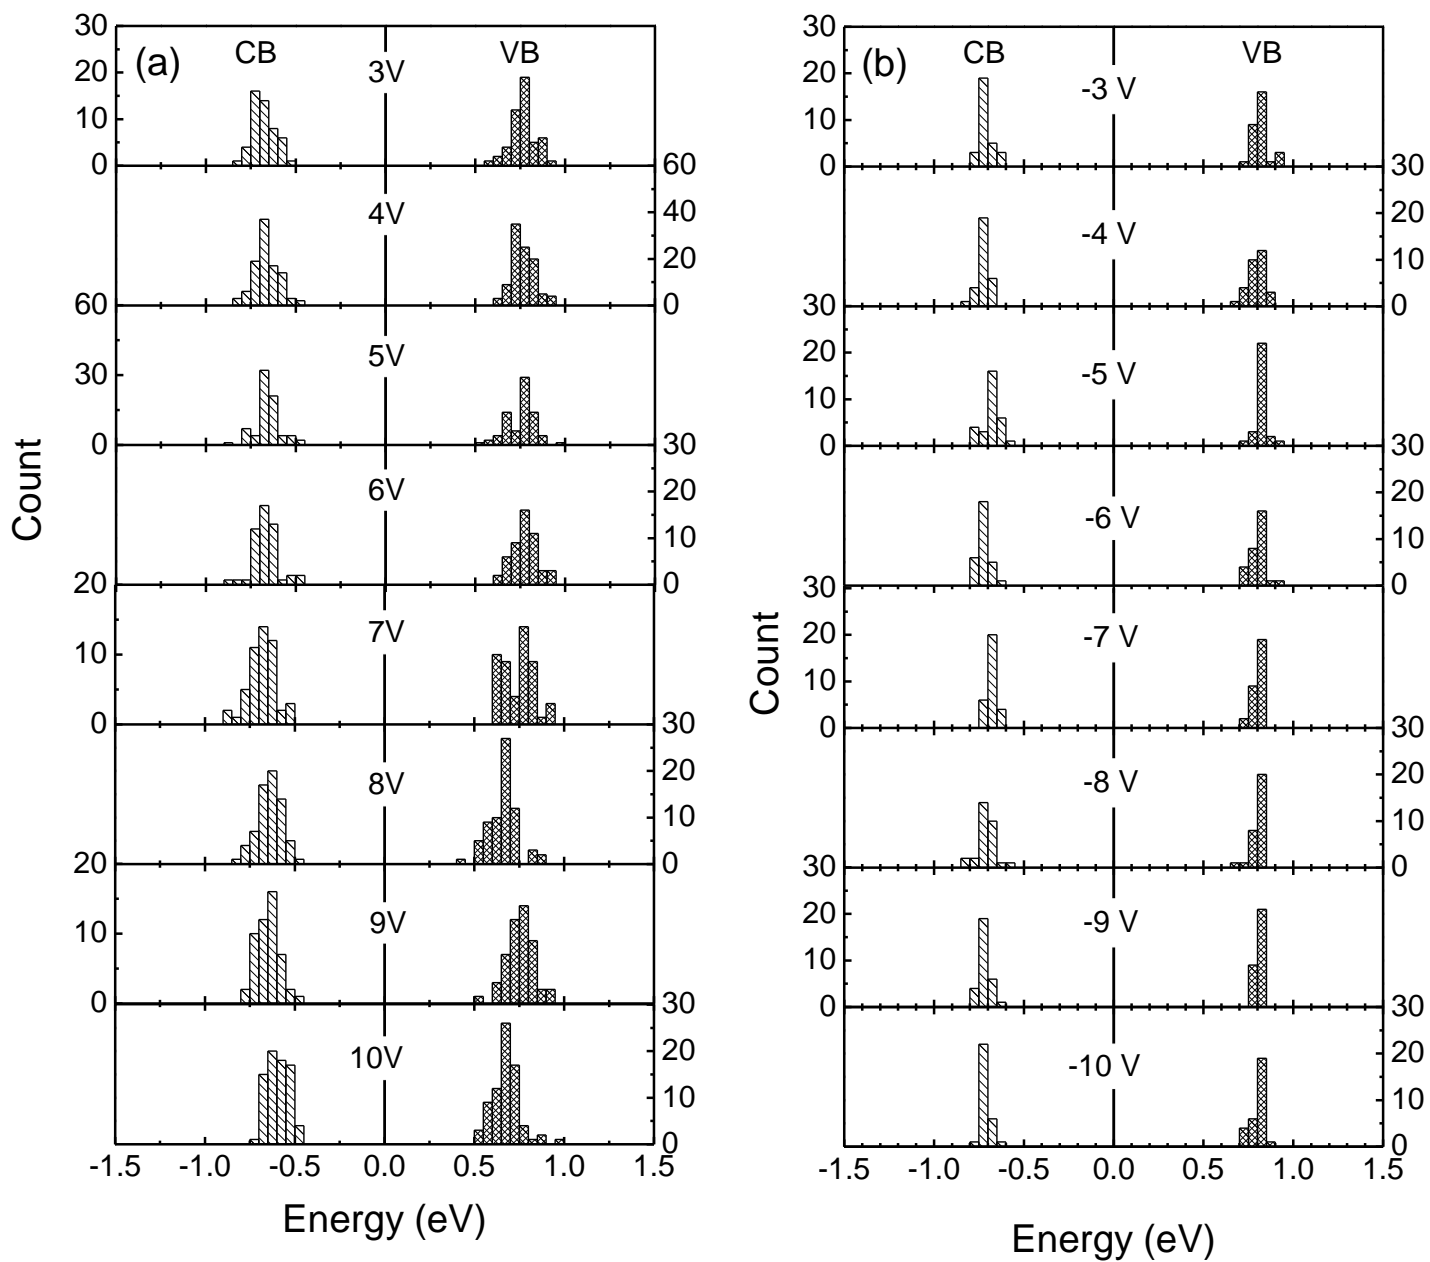

**Figure S4.** Histograms of band-edges in MAPbI<sub>3</sub> thin-films under (a) positive poling voltages and (b) negative poling voltages as stated in the legends.
